# Supplementary material
Source: PubMed Central journal article supplement (PMC545523)
Supplement: pnas_102_3_856__4.pdf [file pnas_102_3_856__4.pdf]

BepA 1 MPRKAKARTKTEIISPRSEIVENTTTLRNKYGIKLNNAFLKESGHIITAKAMINLRRESIF 6C  
 BepB 1 MPRKAKAK--NISTASPRNLIKDEGTQILRNKYGETDLKLLLEKLDREQAMNLRRESIF 5E  
 BepC 1 -----MLSENNLAKNSNTLNRNKYGIKDPQLRYERCAHDTAR EVMNLRFEFPIF 4F  
 Fic-1 1 MPRKAKERTKNIETSSEIVENTTTLRNKYGIITNFDAFTAKYTHITAKALINLRREAPLIF 6C

COG2184.1 consensus RMDLDFEG----RDE--LIMESEGVLRNLLRITTDQQLLEAEYELSLRIDEI--ESGPR

BepA 61 EY--RDTATLGHFHQLERKNTFEWAGHLEHIDFTSPGTTAAMRSPKRTGWNNAFAIGDEI 11S  
 BepB 59 EY--RDCAVLYLTHQCLEKTFEWAGHLEHIDFTSPGSSIAAMRSPKRTGWNKDFAKSEKI 11T  
 BepC 48 QR--SGLAVLKLHWLTHRSFEWAGHLEHIDFTSPGSSIAAMRSPKGRHVVFVAVGPCI 10G  
 Fic-1 61 EK--RDSYVLSHGHQLERKNTFEWAGHLEHIDFTSPGSSIAAMRSPKRAEWNVVFANDEI 11S

COG2184.1 consensus KGGLDLHNRRAHTRQLRQDIFEWAGHLEHIDFTSPGSSIAAMRSPKRAEWNVVFANDEI

BepA 120 QEG--RHDQTLAEKNNLQGLAREEENSFALEIENSINLHPSREENRTRCRLESPENAKA 17S  
 BepB 118 PEL--RQDQTLAEKNNLQGLAREEENKQTEIHYSEHKHLEPDIENHEEQHSPENAKA 17T  
 BepC 107 QKE--RQDQTLAEKNNLQGLAREEENKQTEIHYSEHKHLEPDIENHEEQHSPENAKA 16E  
 Fic-1 120 EEG--RHDQTLAEKNNLQGLAREEENSFALEIENSINLHPSREENRTRCRLESPENAKA 17S

COG2184.1 consensus ERADYVAQWMPQETY-----LSEVFRHAKIVEINIAHPSREENRTRCRLESPENAKA

BepA 180 AGHQLNFSYDTRKRMVAVSVAVAENGDLERMQHLEFEDDISNRRIRLLKREHMTTKNVE--R 23E  
 BepB 178 AGHQLNFSYDTRKRMVAVSVAVAENGDLERMQHLEFEDDISNRRIRLLKREHMTTKNVE--R 23E  
 BepC 167 AGYKILNFSYDTRKRMVAVSVAVAENGDLERMQHLEFEDDISNRRIRLLKREHMTTKNVE--R 22E  
 Fic-1 180 AGHQLNFSYDTRKRMVAVSVAATQNDNLEEMQHLEFEDDISNRRIRLLKREHMTTKNVE--R 23E

COG2184.1 consensus LGRALIMQSTISKE---AYLQALRRG---ENAKALALIT-ALREIIRGIRIQAGEYI--E

BepA 239 NVNDRVAVVIRESETYVSRVRSAGLEGALNVKGYIIGDIDHLEPQLRIRKIKGKRT 29T  
 BepB 237 NVNDCVAVVIRKSETYVSRVRSYSEAFVLDMQGTYIIGKIDDLLEPRLRSRIRKIGKRT 29S  
 BepC 227 EINEHIVVIRKSETYVSRVRSYSEAFVLELEDGFVGHKIDDLLEPVRVLRQGRIV 28S  
 Fic-1 239 DINDRVAVVIRESETYVSRVRSAGHDSLAFNVNGAYIIGDKELDLLEPQLRIRKIKGKRT 29T

COG2184.1 consensus -----

BepA 298 VTA PKAEIIRKKT 309  
 BepB 296 VTA PKNKLENT 307  
 BepC 286 VRKSNVLIIRKEI 297  
 Fic-1 298 VTA SQTQLEIRNI 309

COG2184.1 consensus -----
