# Supplementary material
Source: PubMed Central journal article supplement (PMC545523)
Supplement: pnas_102_3_856__5.pdf [file pnas_102_3_856__5.pdf]

**A**

|     |                    |     |                                            |
|-----|--------------------|-----|--------------------------------------------|
| 19  | EQARTESQAEPLNAQVN  | 36  | Site Y32 = SH2-domain binding motif (SH2)  |
| 39  | PREHRAQSSEETIYAPQN | 56  |                                            |
| 59  | ETIYAEQKPLGNFDRLG  | 76  |                                            |
| 79  | PRNGRRAEKLVDPIAVTD | 96  |                                            |
| 101 | DRGADFQTLNPLIEGVG  | 118 | Site Y114 = PTB-domain binding motif (PTB) |
| 121 | AHGGPHPQEPHEHIAELE | 138 |                                            |
| 142 | QSGRSFQKPFVESVAVTG | 159 |                                            |
| 163 | EGGQDTQTLKNPLIEGVG | 180 | Site Y176 = PTB-domain binding motif (PTB) |
| 199 | EQARRAESQAEPLNAQVN | 216 | Site Y211 = SH2-domain binding motif (SH2) |
| 218 | PREHRAQSSEETIYAPQN | 235 |                                            |
| 238 | ETIYAEQKPLGNFDRLG  | 255 |                                            |
| 258 | PRNGRRAEKLVDPIAVTD | 275 |                                            |
| 280 | DRGADFQTLNPLIEGVG  | 297 | Site Y293 = PTB-domain binding motif (PTB) |
| 300 | AHGGPHPQEPHEHIAELE | 317 |                                            |
| 321 | QSGRSFQKPFVESVAVTG | 338 |                                            |
| 342 | EGGQDTQTLKNPLIEGVG | 359 | Site Y355 = PTB-domain binding motif (PTB) |

Consensus ergrrrqkpleplYAvvg

**B**

|     |                  |     |                                           |
|-----|------------------|-----|-------------------------------------------|
| 11  | THSTEKQREPLTQSQS | 24  |                                           |
| 27  | RAPSPQEPPLIYATV  | 40  | Site Y37 = SH2-domain binding motif (SH2) |
| 54  | KPLSQQEEVVAAL    | 67  |                                           |
| 81  | PERNLESETIYTTV   | 94  | Site Y91 = SH2-domain binding motif (SH2) |
| 96  | SQSTIQAEILVADV   | 109 |                                           |
| 119 | TRRDPASETIYAEV   | 132 |                                           |

Consensus testpqsEtIYAtv

**C**

|     |                   |     |                                            |
|-----|-------------------|-----|--------------------------------------------|
| 104 | QSSQSTPLYATPLPQQ  | 120 |                                            |
| 140 | TAPODSTPLYATPSFQQ | 156 | Site Y149 = SH2-domain binding motif (SH2) |
| 176 | AAEQDSTPLYATPSFHK | 192 | Site Y185 = SH2-domain binding motif (SH2) |
| 204 | TSSQDSEPLYATPLPQR | 220 | Site Y213 = SH2-domain binding motif (SH2) |
| 232 | TSNQDSEPLYATPLPQR | 248 | Site Y241 = SH2-domain binding motif (SH2) |
| 260 | TSSQDSEPLYATPLPQR | 276 | Site Y269 = SH2-domain binding motif (SH2) |
| 288 | TSSQDNEPLYATPAFQQ | 304 |                                            |

Consensus tssqdstPLYATpLpqq
