# Supplementary material
Source: PubMed Central journal article supplement (PMC545523)
Supplement: pnas_102_3_856__6.pdf [file pnas_102_3_856__6.pdf]

BepA 310 LIPKETLVPLTKLEIAEMVAEDAFVHTCRDQICSLSKIIVYGSQGVNKNIEEI-----IKNPSKGOQLATQIERTPYSVHSLAGFDLICFKTGARVRAEKHVALISCAVANFTHAVKHARQEIITKEHQAEQNRLRQEVPMPS 446  
 BepB 308 LIPKETLAPLTKSECARTVAQTSHVLTAQKKVRQHSKIIVYGNANTINEQIEEI-----TKNPELGQLLADQIRQTPHSLSPLAGFSLCGLQNPANARNHLDAEATTVANVAHIVEHTYHVITQKHQIEQERLGKTVEKPS 444  
 BepC 298 LIPKETLPPLTNEELAKRFTDNCGVESYRQEVVHLSKPIVYGKSQAENEMIESI-----NIDPSLGAEFADQIAQNPKSFCCLAGRKILGIRSPSRRAEEAVPQCEALKSYADMAQHTMENLIEQHOREQRRIASVVEKPG 434  
 BepD 360 PGRATSPPRSPKDEVTSKLLKHTDFQHGVEVQEWCKIIVYGNQYANKNKLCKI-----LENPKAGDTILWDLAADPESAGKLAGQKILGIKSPDRKQAEEGFGSLCAAFERHVAITQKLHKDFTLEQEKORGHRETSPERQ 496  
 BepE 132 VAMQSTIPSLTREEIADRMQHNPLVQAYQQEVMHWCKIIVYGNSDVYKEKMQEV-----LQKPESEGEDLSRQVAENPTSVHKLAGRNLCGLKTNARQAEEGFMHLCQALDGYTSAVTQAEENIKHVPOAEARRYGOESEORA 266  
 BepE 276 RHPERERQSLSNQELLGMVQENASIQRYQAQVEHWCKIIVYGNSSVYKEKMEGI-----LQDLSEGEELSWQVAAYPQSVHKLAGHNVCGLKTSARRHAEESGLSHLCDAIDNYTDAVRQIKESITRGRQAQTRQNRQEQSVGV 411  
 BepF 298 ATAAPSQSPRMEEKSVNTMQRNLLLEAYKEEIKYWGGIIVYGDRLIQKRIEEI-----QENPALGEQLSWEVSEHPKSIKSLAGKKMLGVTKARRKAEENYLAARDTINSYVYTLKYSQOKPLHAPHTETTRDEQOTHRTQ 434  
 BepF 435 SAEKE-RAPLSNQEELADRI RTEPSVLYSQTEVQYWSKIIVFGNPYDIQYRIEDI-----QKNPDMGEEFSWQVANNPSLFSPLAGKRILGIKNDARRHAEASLSQCSAIEGYADAVKQAKEDIVQYQVQSSRQELSTEPAK 57C  
 BepF 650 TPEKE-KTPLSHKEIASRVQNDLSVQRAQIEIYNWCNIVYNNPLVQHTTEDI-----KKIPELGEELSWQVANFSTIFAPLAGQVVLGIKNNARKHAEAAIPSLCTAIDHYTEIVKQVREDIVKNHQEQSPKKDKNVKROQ 785  
 BepG 13 SASVTQMASLSNEEIFNRVQRDPLVQSCEEEIQYWCKIIVFGNAYVQYRIEDM-----QKIPEIGEELSWQISENPHFFHKLAGSOTLGIKNSARKHAEAGISSLCNAIETYADTVKQVRKSIVOAHQAQONRQELSSB-PS 145  
 BepG 271 LIEKETIPSLTNEEVASKIRESEVVKSSMOKIKTLQGVVYGNPHIDEGKMPKMGIPVTNRNVEELEK FARQVGSFPSSFGRVAGFSFLGIKSGARAHAEENFLPLSHAI VSYTHNVKQAEKDILEAHSGKQERYAQS VETPS 412  
 BepG 429 LIEKEIIPPLSYVDVASKIRESEVVKSSKQKIETLCSVVYGNPRIDEDKMPKMGIPVTNKNVEELEK FARQVGNFPSSCGKIVGFNFLGIKSEARAHAEENFLPLSHAI FSYAHSVKQAEKDILEAYFKEQERCAQS VETPS 57C  
 BepG 723 LIEKEIIPPLSYVDVASKIRESEVVKSSMOKIKTLQSVVYGNPDIDEGKMPKMGIPVTNKNVEELEK FARQVGNFPSSCGKIVGFSFLGIKSEARAHAEENFLPLSHAI FSYAHSVKQAEKDILEAYFKEQERCAQS VETPS 864

Consensus lipketlpPLtneEiasrvqenplVqsyqqEvqhWCKIIVYGNpyvLnkieeI-----lknPslGEeLswQvaenPkSfhKLAGkklLGIKtpARrhAEegfssLCdAiesYadaVqqaRedItqahqaegrRqeqsvekps
