# Supplementary material
Source: PubMed Central journal article supplement (PMC545523)

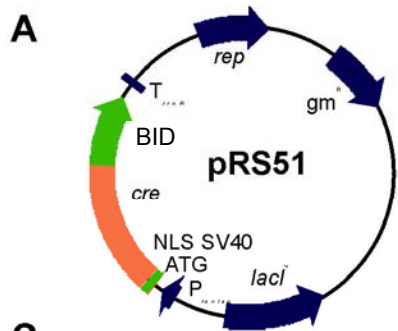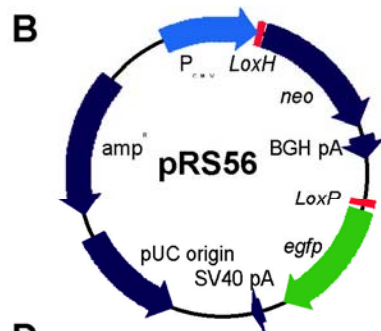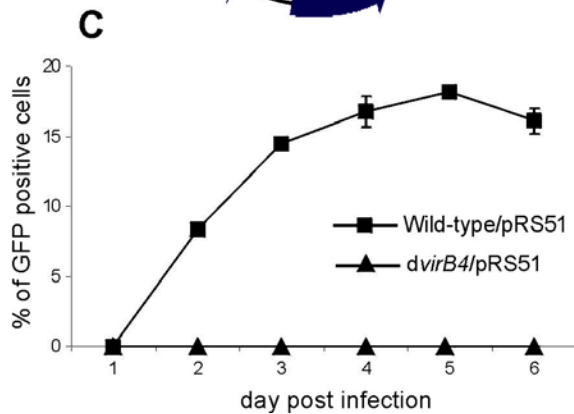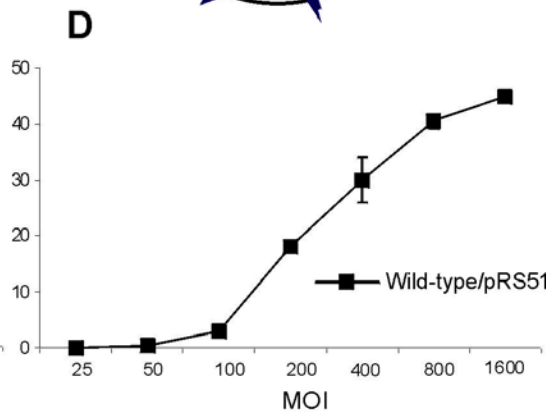

Supplement: pnas_102_3_856__7.pdf [file pnas_102_3_856__7.pdf]
